# Supplementary material
Source: PubMed Central journal article supplement (PMC10234870)
Supplement: 705_2023_5801_MOESM1_ESM.pdf [file 705_2023_5801_MOESM1_ESM.pdf]

# SARS-CoV-2 and the Nervous System: Current Perspectives

Archives of Virology, Springer

Amrita Pattanaik <sup>1,\*</sup>, Sushma Bhandarkar B <sup>1</sup>, Lonika Lodha <sup>2</sup>, Srilatha Marate <sup>1</sup>

<sup>1</sup> Manipal Institute of Virology, Manipal Academy of Higher Education (MAHE), Manipal, Karnataka, India. PIN-576104

<sup>2</sup> Department of Neurovirology, National Institute of Mental Health and Neurosciences (NIMHANS), Bengaluru, Karnataka, India. PIN-560029

\*Correspondence: [amrita.pattanaik@manipal.edu](mailto:amrita.pattanaik@manipal.edu)

Table: The wide spectrum of reported neurological and psychiatric manifestations with the prevalence rates

| Year of publication | Location of study | Sample Size for followup | Point of follow-up                        | Fatigue | Confusion or brain fog or mental slowness | Stress or anxiety | Taste dysfunction | Smell dysfunction | Headache | Insomnia or sleep difficulties | Dizziness or light headedness or vertigo | Vision changes | Tinnitus | Attention Disorder /Cognitive/memory/concentration impairment | Stroke | Incontinence (fecal or urinary) | Functional impairment | Hearing loss | Sensitivity disorder | Intracranial hemorrhage | GBS | Movement disturbances | Gait disturbances | Postural instability or falls | Swallowing difficulty | Myalgia | Autoimmune encephalitis | Parasthesia or numbness or tingling | Reference |
|---------------------|-------------------|--------------------------|-------------------------------------------|---------|-------------------------------------------|-------------------|-------------------|-------------------|----------|--------------------------------|------------------------------------------|----------------|----------|---------------------------------------------------------------|--------|---------------------------------|-----------------------|--------------|----------------------|-------------------------|-----|-----------------------|-------------------|-------------------------------|-----------------------|---------|-------------------------|-------------------------------------|-----------|
| 2020                | Italy             | 143                      | mean of 60.3 (SD, 13.6) days post onset   | 53.1    |                                           |                   | ~10               | ~15               | ~8       |                                | ~5                                       |                |          |                                                               |        |                                 |                       |              |                      |                         |     |                       |                   |                               |                       |         |                         |                                     | [1]       |
| 2020                | US                | 274                      | 14-21 days post onset                     | 71      | ~20                                       |                   | ~25               | ~20               | 61       |                                |                                          |                |          |                                                               |        |                                 |                       |              |                      |                         |     |                       |                   |                               |                       |         |                         |                                     | [2]       |
| 2020                | UK                | 68 (from wards)          | mean 48 days (range 29-71) post discharge | 60.3    |                                           |                   |                   |                   |          |                                |                                          |                |          | 16.2                                                          |        | Bowel 2.9, Bladder 8.8          |                       |              |                      |                         |     |                       |                   |                               | 5.9                   |         |                         |                                     | [3]       |

| Year of publication | Location of study       | Sample Size for followup | Point of follow-up                        | Fatigue | Confusion or brain fog or mental slowness | Stress or anxiety | Taste dysfunction | Smell dysfunction | Headache | Insomnia or sleep difficulties | Dizziness or light headedness or vertigo | Vision changes | Tinnitus | Attention Disorder /Cognitive/memory/concentration impairment | Stroke | Incontinence (fecal or urinary) | Functional impairment | Hearing loss | Sensitivity disorder | Intracranial hemorrhage | GBS | Movement disturbances | Gait disturbances | Postural instability or falls | Swallowing difficulty | Myalgia | Autoimmune encephalitis | Parasthesia or numbness or tingling | Reference |     |
|---------------------|-------------------------|--------------------------|-------------------------------------------|---------|-------------------------------------------|-------------------|-------------------|-------------------|----------|--------------------------------|------------------------------------------|----------------|----------|---------------------------------------------------------------|--------|---------------------------------|-----------------------|--------------|----------------------|-------------------------|-----|-----------------------|-------------------|-------------------------------|-----------------------|---------|-------------------------|-------------------------------------|-----------|-----|
| 2020                | UK                      | 32 (from ICU)            | mean 48 days (range 29-71) post discharge | 72      |                                           |                   |                   |                   |          |                                |                                          |                |          | 34.4                                                          |        | Bowel 3.1, bladder 12.5         |                       |              |                      |                         |     |                       |                   |                               | 12.5                  |         |                         |                                     |           | [3] |
| 2020                | Netherlands and Belgium | 2113                     | mean period of 79±17 days post onset      | 87      |                                           |                   | 11                | 13                | 38       |                                | 27                                       | 12             |          |                                                               |        |                                 |                       |              |                      |                         |     |                       |                   |                               |                       |         |                         |                                     | [4]       |     |
| 2021                | US                      | 303                      | median 63 (IQR 53, 87.5) days post onset  | 37.5    | 30.8                                      | 30.8              | 26.4              |                   | 20.7     | 22.1                           | 12.5                                     | 6.3            | 9.1      |                                                               |        |                                 |                       |              |                      |                         |     |                       |                   |                               |                       |         |                         |                                     | [5]       |     |
| 2021                | US                      | 1733                     | median 186 (175-199) days post onset      | 63      |                                           | 23                | 7                 | 11                | 2        | 26                             | 6                                        |                |          |                                                               |        |                                 |                       |              |                      |                         |     |                       |                   |                               |                       |         |                         |                                     | [6]       |     |

| Year of publication | Location of study | Sample Size for followup | Point of follow-up                              | Fatigue | Confusion or brain fog or mental slowness | Stress or anxiety | Taste dysfunction | Smell dysfunction | Headache | Insomnia or sleep difficulties | Dizziness or light headedness or vertigo | Vision changes | Tinnitus | Attention Disorder /Cognitive/memory/concentration impairment | Stroke | Incontinence (fecal or urinary) | Functional impairment | Hearing loss | Sensitivity disorder | Intracranial hemorrhage | GBS      | Movement disturbances | Gait disturbances | Postural instability or falls | Swallowing difficulty | Myalgia | Autoimmune encephalitis | Parasthesia or numbness or tingling | Reference |
|---------------------|-------------------|--------------------------|-------------------------------------------------|---------|-------------------------------------------|-------------------|-------------------|-------------------|----------|--------------------------------|------------------------------------------|----------------|----------|---------------------------------------------------------------|--------|---------------------------------|-----------------------|--------------|----------------------|-------------------------|----------|-----------------------|-------------------|-------------------------------|-----------------------|---------|-------------------------|-------------------------------------|-----------|
| 2021                | China             | 538                      | median 97 (range 91 to 166) days post discharge | 28.3    |                                           | 6.5               |                   |                   |          | 17.7                           | 2.6                                      |                |          |                                                               |        |                                 |                       |              |                      |                         |          |                       |                   |                               |                       |         |                         |                                     | [7]       |
| 2021                | UK                | 110                      | Median 90 days post onset                       | 39      |                                           |                   |                   | 10                | ~5       | 24                             |                                          |                |          |                                                               |        |                                 |                       |              |                      |                         |          |                       |                   |                               |                       |         |                         |                                     | [8]       |
| 2021                | China             | 1276                     | median 185 days post onset                      | 52      |                                           |                   | 7                 | 11                | 2        | 27                             | 6                                        |                |          |                                                               |        |                                 |                       |              |                      |                         |          |                       |                   |                               |                       |         |                         |                                     | [9]       |
| 2021                | China             | 1276                     | median 349 days post onset                      | 20      |                                           |                   | 3                 | 4                 | 5        | 17                             | 5                                        |                |          |                                                               |        |                                 |                       |              |                      |                         |          |                       |                   |                               |                       |         |                         |                                     | [9]       |
| 2021                | US                | 2363<br>79               | 6 months                                        |         |                                           | 23.98             |                   |                   |          | 5.4                            |                                          |                |          | 2.1                                                           |        |                                 |                       |              |                      | 0.5                     | 0.0<br>8 |                       |                   |                               |                       |         |                         |                                     | [10]      |
| 2021                | China             | 932                      | 3 months                                        | 1.8     |                                           |                   | 0.8               | 0.5               |          |                                |                                          |                |          |                                                               |        |                                 |                       |              |                      |                         |          |                       |                   |                               |                       |         |                         |                                     | [11]      |
| 2021                | Italy             | 91                       | 30 days post discharge                          | 52      |                                           | 21                |                   | 14                |          | 31                             |                                          |                |          |                                                               |        |                                 |                       |              |                      |                         |          |                       |                   |                               |                       |         |                         |                                     | [12]      |

| Year of publication | Location of study | Sample Size for followup | Point of follow-up             | Fatigue | Confusion or brain fog or mental slowness | Stress or anxiety | Taste dysfunction | Smell dysfunction | Headache | Insomnia or sleep difficulties | Dizziness or light headedness or vertigo | Vision changes | Tinnitus | Attention Disorder /Cognitive/memory/concentration impairment | Stroke | Incontinence (fecal or urinary) | Functional impairment | Hearing loss | Sensitivity disorder | Intracranial hemorrhage | GBS | Movement disturbances | Gait disturbances | Postural instability or falls | Swallowing difficulty | Myalgia | Autoimmune encephalitis | Parasthesia or numbness or tingling | Reference |
|---------------------|-------------------|--------------------------|--------------------------------|---------|-------------------------------------------|-------------------|-------------------|-------------------|----------|--------------------------------|------------------------------------------|----------------|----------|---------------------------------------------------------------|--------|---------------------------------|-----------------------|--------------|----------------------|-------------------------|-----|-----------------------|-------------------|-------------------------------|-----------------------|---------|-------------------------|-------------------------------------|-----------|
| 2021                | France            | 478                      | median 113 days post discharge | 31.1    | 10.1                                      |                   |                   | 6                 | 5.5      |                                |                                          |                |          | 17.5                                                          |        |                                 |                       |              |                      |                         |     |                       |                   |                               |                       |         |                         | 12.1                                | [13]      |
| 2021                | Germany           | 442                      | median 131 days (IQR 112–149)  | 9.7     |                                           |                   | 11.1              | 12.4              |          |                                |                                          |                |          |                                                               |        |                                 |                       |              |                      |                         |     |                       |                   |                               |                       |         |                         |                                     | [14]      |
| 2021                | Germany           | 353                      | median 207 days (IQR 187–234)  | 14.7    |                                           |                   | 11                | 14.7              |          |                                |                                          |                |          |                                                               |        |                                 |                       |              |                      |                         |     |                       |                   |                               |                       |         |                         |                                     | [14]      |
| 2021                | Spain             | 797                      | 6 months post discharge        | 22.1    | 2.6                                       | 6.8               | 7.2               |                   | 5.3      | 4.9                            | 1.9                                      | 4.6            |          |                                                               |        |                                 |                       |              |                      |                         |     | 3.4                   |                   |                               |                       |         |                         | 3.4                                 | [15]      |
| 2021                | China             | 796                      | 6 months post discharge        | 25.3    |                                           |                   |                   |                   |          | 23.2                           |                                          |                |          |                                                               |        |                                 |                       |              |                      |                         |     |                       |                   |                               |                       |         |                         |                                     | [16]      |
| 2021                | Italy             | 165                      | 6 months post discharge        | 33.9    | 13.3                                      | 26.7              | 16.4              |                   |          | 31.5                           |                                          | 19.5           |          | 31.5                                                          |        | 13.9                            |                       |              |                      |                         |     | 10.3                  | 10.9              | 8.5                           | 6.1                   |         |                         | 18.8                                | [17]      |
| 2021                | Norway            | 312                      | 6 months post illness          | 37      |                                           |                   | 25                |                   |          |                                |                                          |                |          | 26                                                            |        |                                 |                       |              |                      |                         |     |                       |                   |                               |                       |         |                         |                                     | [18]      |

| Year of publication | Location of study | Sample Size for followup | Point of follow-up                        | Fatigue | Confusion or brain fog or mental slowness | Stress or anxiety | Taste dysfunction | Smell dysfunction | Headache | Insomnia or sleep difficulties | Dizziness or light headedness or vertigo | Vision changes | Tinnitus | Attention Disorder /Cognitive/memory/concentration impairment | Stroke | Incontinence (fecal or urinary) | Functional impairment | Hearing loss | Sensitivity disorder | Intracranial hemorrhage | GBS | Movement disturbances | Gait disturbances | Postural instability or falls | Swallowing difficulty | Myalgia | Autoimmune encephalitis | Parasthesia or numbness or tingling | Reference |
|---------------------|-------------------|--------------------------|-------------------------------------------|---------|-------------------------------------------|-------------------|-------------------|-------------------|----------|--------------------------------|------------------------------------------|----------------|----------|---------------------------------------------------------------|--------|---------------------------------|-----------------------|--------------|----------------------|-------------------------|-----|-----------------------|-------------------|-------------------------------|-----------------------|---------|-------------------------|-------------------------------------|-----------|
| 2021                | China             | 2433                     | 1 year post illness                       | 27.7    |                                           | 10.4              | 1.4               | 1.3               | 2.3      |                                | 3.3                                      |                |          |                                                               |        |                                 |                       |              |                      |                         |     |                       |                   |                               |                       |         |                         |                                     | [19]      |
| 2021                | Spain             | 277                      | median 77 days (IQR 72–85) post onset     | 34.8    |                                           |                   | 21.4              |                   | 17.8     |                                |                                          | 5.4            |          | 15.2                                                          |        |                                 |                       |              |                      |                         |     |                       |                   |                               |                       |         |                         |                                     | [20]      |
| 2021                | US                | 177                      | median 169 (range 31-300) days post onset | 13.6    | 2.3                                       |                   | 13.6              |                   |          |                                |                                          |                |          |                                                               |        |                                 |                       |              |                      |                         |     |                       |                   |                               |                       |         |                         |                                     | [21]      |
| 2021                | Italy             | 599                      | median 191 (IQR 172-204) days post onset  | 13.1    |                                           |                   | 10.4              |                   | 2.7      |                                |                                          | 0.3            |          |                                                               |        |                                 |                       |              |                      |                         |     |                       |                   |                               |                       |         |                         |                                     | [22]      |

| Year of publication | Location of study | Sample Size for followup | Point of follow-up                                    | Fatigue | Confusion or brain fog or mental slowness | Stress or anxiety | Taste dysfunction | Smell dysfunction | Headache | Insomnia or sleep difficulties | Dizziness or light headedness or vertigo | Vision changes | Tinnitus | Attention Disorder /Cognitive/memory/concentration impairment | Stroke | Incontinence (fecal or urinary) | Functional impairment | Hearing loss | Sensitivity disorder | Intracranial hemorrhage | GBS | Movement disturbances | Gait disturbances | Postural instability or falls | Swallowing difficulty | Myalgia | Autoimmune encephalitis | Parasthesia or numbness or tingling | Reference |
|---------------------|-------------------|--------------------------|-------------------------------------------------------|---------|-------------------------------------------|-------------------|-------------------|-------------------|----------|--------------------------------|------------------------------------------|----------------|----------|---------------------------------------------------------------|--------|---------------------------------|-----------------------|--------------|----------------------|-------------------------|-----|-----------------------|-------------------|-------------------------------|-----------------------|---------|-------------------------|-------------------------------------|-----------|
| 2021                | Norway            | 676                      | mean 132 days (SD 35 days) after testing              | 23      |                                           |                   | 14                |                   | 13       |                                |                                          |                |          |                                                               |        |                                 |                       |              |                      |                         |     |                       |                   |                               |                       | 8       |                         |                                     | [23]      |
| 2021                | Colombia          | 100                      | median 219 days (IQR: 143–258) post onset             | 34      |                                           |                   | 15                | 11                | 45       | 1                              | 31                                       | 21             | 23       | 36                                                            |        |                                 |                       |              |                      |                         |     |                       |                   |                               |                       | 42      | 38                      | [24]                                |           |
| 2021                | Bangladesh        | 355                      | Continuous followup for atleast 1 month post recovery | 33      |                                           |                   |                   | 2                 | 3.4      | 3.9                            | 2.3                                      |                | 0.3      |                                                               |        |                                 |                       |              |                      |                         |     |                       |                   |                               |                       | 0.6     |                         | [25]                                |           |

| Year of publication | Location of study | Sample Size for followup | Point of follow-up            | Fatigue | Confusion or brain fog or mental slowness | Stress or anxiety | Taste dysfunction | Smell dysfunction | Headache | Insomnia or sleep difficulties | Dizziness or light headedness or vertigo | Vision changes | Tinnitus | Attention Disorder /Cognitive/memory/concentration impairment | Stroke | Incontinence (fecal or urinary) | Functional impairment | Hearing loss | Sensitivity disorder | Intracranial hemorrhage | GBS | Movement disturbances | Gait disturbances | Postural instability or falls | Swallowing difficulty | Myalgia | Autoimmune encephalitis | Parasthesia or numbness or tingling | Reference |
|---------------------|-------------------|--------------------------|-------------------------------|---------|-------------------------------------------|-------------------|-------------------|-------------------|----------|--------------------------------|------------------------------------------|----------------|----------|---------------------------------------------------------------|--------|---------------------------------|-----------------------|--------------|----------------------|-------------------------|-----|-----------------------|-------------------|-------------------------------|-----------------------|---------|-------------------------|-------------------------------------|-----------|
| 2021                | US                | 273,618                  | 6 months post infection       | 12.82   | 22.82                                     |                   |                   |                   | 8.6      |                                |                                          |                |          | 7.8                                                           |        |                                 |                       |              |                      |                         |     |                       |                   |                               |                       | 3.2     |                         |                                     | [26]      |
| 2021                | UK                | 327                      | Median 222 days post covid    | 83      |                                           |                   |                   |                   |          |                                |                                          |                |          |                                                               |        |                                 |                       |              |                      |                         |     |                       |                   |                               |                       |         |                         |                                     | [27]      |
| 2022                | UK                | 144                      | Mean of 143.3 days post onset | 53.5    |                                           |                   | 6.3               | 6.9               |          | 14.6                           |                                          |                |          | 18                                                            |        |                                 |                       |              |                      |                         |     |                       |                   |                               |                       |         |                         |                                     | [28]      |

| Year of publication | Location of study | Sample Size for followup | Point of follow-up                   | Fatigue | Confusion or brain fog or mental slowness | Stress or anxiety | Taste dysfunction | Smell dysfunction | Headache | Insomnia or sleep difficulties | Dizziness or light headedness or vertigo | Vision changes | Tinnitus | Attention Disorder /Cognitive/memory/concentration impairment | Stroke | Incontinence (fecal or urinary) | Functional impairment | Hearing loss | Sensitivity disorder | Intracranial hemorrhage | GBS | Movement disturbances | Gait disturbances | Postural instability or falls | Swallowing difficulty | Myalgia | Autoimmune encephalitis | Parasthesia or numbness or tingling | Reference |
|---------------------|-------------------|--------------------------|--------------------------------------|---------|-------------------------------------------|-------------------|-------------------|-------------------|----------|--------------------------------|------------------------------------------|----------------|----------|---------------------------------------------------------------|--------|---------------------------------|-----------------------|--------------|----------------------|-------------------------|-----|-----------------------|-------------------|-------------------------------|-----------------------|---------|-------------------------|-------------------------------------|-----------|
| 2022                | US                | 156                      | median 351 (range 82-457) post onset | 82      | 67                                        |                   |                   |                   | 60       | 59                             | 54                                       | ~25            | ~30      | ~50                                                           |        |                                 |                       |              |                      |                         |     |                       |                   |                               |                       |         |                         |                                     | [29]      |
| 2022                | Meta-analyses     | 10530                    |                                      | 37      | 32                                        | 23                | 12                | 10                | 15       | 31                             |                                          |                |          | 28                                                            |        |                                 |                       |              |                      |                         |     |                       |                   |                               |                       | 17      |                         |                                     | [30]      |
| 2022                | Poland            | 2218                     | 3 months post infection              | 35.6    | 12.1                                      |                   |                   | 4.4               | 29.8     |                                |                                          |                |          |                                                               |        |                                 |                       |              |                      |                         |     |                       |                   |                               |                       |         |                         |                                     | [31]      |
| 2022                | Korea             | 900                      | 6 months post infection              | 25.3    | 12                                        | 24.1              | 6.6               | 8.7               | 12.4     | 21.2                           | 14.9                                     |                | 6.6      | 25.3                                                          |        |                                 |                       | 2.5          |                      |                         |     |                       |                   |                               |                       |         |                         |                                     | [32]      |



| Year of publication | Location of study | Sample Size for followup         | Point of follow-up                                           | Fatigue | Confusion or brain fog or mental slowness | Stress or anxiety | Taste dysfunction | Smell dysfunction | Headache | Insomnia or sleep difficulties | Dizziness or light headedness or vertigo | Vision changes | Tinnitus | Attention Disorder /Cognitive/memory/concentration impairment | Stroke | Incontinence (fecal or urinary) | Functional impairment | Hearing loss | Sensitivity disorder | Intracranial hemorrhage | GBS | Movement disturbances | Gait disturbances | Postural instability or falls | Swallowing difficulty | Myalgia | Autoimmune encephalitis | Parasthesia or numbness or tingling | Reference |
|---------------------|-------------------|----------------------------------|--------------------------------------------------------------|---------|-------------------------------------------|-------------------|-------------------|-------------------|----------|--------------------------------|------------------------------------------|----------------|----------|---------------------------------------------------------------|--------|---------------------------------|-----------------------|--------------|----------------------|-------------------------|-----|-----------------------|-------------------|-------------------------------|-----------------------|---------|-------------------------|-------------------------------------|-----------|
| 2022                | Korea             | 241                              | 12 months                                                    | 16.2    | 7.1                                       | 16.2              | 3.3               | 6.2               | 4.6      | 13.3                           | 10.4                                     |                | 5.4      | 22.4                                                          |        |                                 |                       | 2.1          |                      |                         |     |                       |                   |                               |                       |         |                         |                                     | [32]      |
| 2022                | Switzerland       | 1807 Covi d- pos, 882 Covi d-neg | Mean 83 days post positive test (mean 84 post negative test) |         |                                           |                   | 2.6               | 3.5               |          | 2.4                            |                                          |                |          |                                                               |        |                                 |                       |              |                      |                         |     |                       |                   |                               |                       |         |                         |                                     | [33]      |
| 2022                | India             | 667                              | 6 months                                                     | 32.2    |                                           |                   | 4.9               | 5.1               | 9.9      | 11.1                           |                                          |                |          |                                                               |        |                                 |                       |              |                      |                         |     |                       |                   |                               |                       |         |                         |                                     | [34]      |
| 2022                | Bangladesh        | 659                              | Unclear                                                      | 42      |                                           |                   | 29                |                   |          |                                |                                          |                |          | 18                                                            |        |                                 |                       |              |                      |                         |     |                       |                   |                               |                       |         |                         |                                     | [35]      |

| Year of publication | Location of study | Sample Size for followup   | Point of follow-up           | Fatigue | Confusion or brain fog or mental slowness | Stress or anxiety | Taste dysfunction | Smell dysfunction | Headache | Insomnia or sleep difficulties | Dizziness or light headedness or vertigo | Vision changes | Tinnitus | Attention Disorder /Cognitive/memory/concentration impairment | Stroke | Incontinence (fecal or urinary) | Functional impairment | Hearing loss | Sensitivity disorder | Intracranial hemorrhage | GBS | Movement disturbances | Gait disturbances | Postural instability or falls | Swallowing difficulty | Myalgia | Autoimmune encephalitis | Parasthesia or numbness or tingling | Reference |
|---------------------|-------------------|----------------------------|------------------------------|---------|-------------------------------------------|-------------------|-------------------|-------------------|----------|--------------------------------|------------------------------------------|----------------|----------|---------------------------------------------------------------|--------|---------------------------------|-----------------------|--------------|----------------------|-------------------------|-----|-----------------------|-------------------|-------------------------------|-----------------------|---------|-------------------------|-------------------------------------|-----------|
| 2022                | Netherlands       | 246 ICU admitted COVID pt. | 1 yr post discharge          | 56.1    |                                           | 17.9              | 6.1               | 6.9               | 5.3      |                                | 11.5                                     | 4.9            |          | 16.2                                                          |        | 3.7                             |                       |              |                      |                         |     |                       |                   |                               | 1.2                   | 21.3    |                         | 20.6                                | [36]      |
| 2022                | Saudi Arabia      | 504                        | >12 weeks post covid         | 19.6    |                                           | ~4                | ~8                | ~14               | ~8       |                                |                                          |                |          |                                                               |        |                                 |                       |              |                      |                         |     |                       |                   |                               |                       |         |                         |                                     | [37]      |
| 2023                | Italy             | 103                        | Mean 243 days post infection | 56.3    |                                           |                   | 56.3              |                   | 45.6     | 29.1                           | 6.8                                      |                |          | 45                                                            |        |                                 |                       |              |                      |                         |     |                       |                   |                               |                       |         |                         |                                     | [38]      |
| 2023                | Ukraine           | 332                        | >4 weeks post infection      | 90      | 25                                        |                   |                   | 70                |          | 70                             |                                          |                |          |                                                               |        |                                 |                       |              |                      |                         |     |                       |                   |                               |                       |         |                         |                                     | [39]      |

| Year of publication | Location of study | Sample Size for followup | Point of follow-up                                                        | Fatigue                 | Confusion or brain fog or mental slowness | Stress or anxiety | Taste dysfunction | Smell dysfunction | Headache | Insomnia or sleep difficulties | Dizziness or light headedness or vertigo | Vision changes | Tinnitus | Attention Disorder /Cognitive/memory/concentration impairment | Stroke | Incontinence (fecal or urinary) | Functional impairment | Hearing loss | Sensitivity disorder | Intracranial hemorrhage | GBS  | Movement disturbances | Gait disturbances | Postural instability or falls | Swallowing difficulty | Myalgia | Autoimmune encephalitis | Parasthesia or numbness or tingling | Reference |
|---------------------|-------------------|--------------------------|---------------------------------------------------------------------------|-------------------------|-------------------------------------------|-------------------|-------------------|-------------------|----------|--------------------------------|------------------------------------------|----------------|----------|---------------------------------------------------------------|--------|---------------------------------|-----------------------|--------------|----------------------|-------------------------|------|-----------------------|-------------------|-------------------------------|-----------------------|---------|-------------------------|-------------------------------------|-----------|
| 2023                | Korea             | 440                      | >4 weeks post infection                                                   |                         | 38.6                                      |                   |                   |                   | 31.1     |                                | 29                                       |                |          | 23.6                                                          |        |                                 |                       |              |                      |                         |      |                       |                   |                               |                       |         |                         |                                     | [40]      |
| 2023                | Sweden            | 204,805                  | 270 (96% participants) and 360 (59% participants) days post positive test | 29 in non-hospitalized; |                                           |                   |                   |                   |          |                                |                                          |                |          |                                                               |        |                                 |                       |              |                      |                         |      |                       |                   |                               |                       |         |                         |                                     | [41]      |
| 2023                | Palestine         | 669                      | 90 days post covid                                                        | 14.9                    | 2.4                                       |                   | 7.3               | 4.6               | 9        | 6.3                            | 1.9                                      |                |          |                                                               |        |                                 |                       |              |                      |                         |      |                       |                   |                               |                       |         |                         |                                     | [42]      |
| 2022                | Meta-analyses     | 55                       | Mean: 33.2 days                                                           |                         |                                           |                   |                   |                   |          |                                |                                          | 12.7           |          |                                                               | 16.4   |                                 |                       |              |                      |                         | 21.8 |                       |                   |                               |                       |         |                         |                                     | [43]      |

1. Patients showing neurological manifestations have been represented in percentages.
2. Columns of percentages for taste and smell dysfunction have been merged wherever they have been reported as single entity.
3. ~ used for approximate percentages where exact numerical data was not available in the study (have been taken from graphs)

## References:

1. Carfi A, Bernabei R, Landi F, for the Gemelli Against COVID-19 Post-Acute Care Study Group (2020) Persistent Symptoms in Patients After Acute COVID-19. *JAMA* 324:603–605. <https://doi.org/10.1001/jama.2020.12603>
2. Tenforde MW (2020) Symptom Duration and Risk Factors for Delayed Return to Usual Health Among Outpatients with COVID-19 in a Multistate Health Care Systems Network — United States, March–June 2020. *MMWR Morb Mortal Wkly Rep* 69:. <https://doi.org/10.15585/mmwr.mm6930e1>
3. Halpin SJ, McIvor C, Whyatt G, et al (2021) Postdischarge symptoms and rehabilitation needs in survivors of COVID-19 infection: A cross-sectional evaluation. *Journal of Medical Virology* 93:1013–1022. <https://doi.org/10.1002/jmv.26368>
4. Goërtz YMJ, Van Herck M, Delbressine JM, et al (2020) Persistent symptoms 3 months after a SARS-CoV-2 infection: the post-COVID-19 syndrome? *ERJ Open Res* 6:00542–02020. <https://doi.org/10.1183/23120541.00542-2020>
5. Bell ML, Catalfamo CJ, Farland LV, et al (2021) Post-acute sequelae of COVID-19 in a non-hospitalized cohort: Results from the Arizona CoVHORT. *PLoS One* 16:e0254347. <https://doi.org/10.1371/journal.pone.0254347>
6. Chopra V, Flanders SA, O'Malley M, et al (2021) Sixty-Day Outcomes Among Patients Hospitalized With COVID-19. *Ann Intern Med* 174:576–578. <https://doi.org/10.7326/M20-5661>
7. Xiong Q, Xu M, Li J, et al (2021) Clinical sequelae of COVID-19 survivors in Wuhan, China: a single-centre longitudinal study. *Clinical Microbiology and Infection* 27:89–95. <https://doi.org/10.1016/j.cmi.2020.09.023>
8. Arnold DT, Hamilton FW, Milne A, et al (2021) Patient outcomes after hospitalisation with COVID-19 and implications for follow-up: results from a prospective UK cohort. *Thorax* 76:399–401. <https://doi.org/10.1136/thoraxjnl-2020-216086>
9. Huang L, Yao Q, Gu X, et al (2021) 1-year outcomes in hospital survivors with COVID-19: a longitudinal cohort study. *The Lancet* 398:747–758. [https://doi.org/10.1016/S0140-6736\(21\)01755-4](https://doi.org/10.1016/S0140-6736(21)01755-4)
10. Taquet M, Geddes JR, Husain M, et al (2021) 6-month neurological and psychiatric outcomes in 236 379 survivors of COVID-19: a retrospective cohort study using electronic health records. *The Lancet Psychiatry* 8:416–427. [https://doi.org/10.1016/S2215-0366\(21\)00084-5](https://doi.org/10.1016/S2215-0366(21)00084-5)
11. Sun LL, Wang J, Wang YS, et al (2021) Symptomatic features and prognosis of 932 hospitalized patients with coronavirus disease 2019 in Wuhan. *Journal of Digestive Diseases* 22:271–281. <https://doi.org/10.1111/1751-2980.12983>
12. Boari GEM, Bonetti S, Braglia-Orlandini F, et al (2021) Short-Term Consequences of SARS-CoV-2-Related Pneumonia: A Follow Up Study. *High Blood Press Cardiovasc Prev* 28:373–381. <https://doi.org/10.1007/s40292-021-00454-w>
13. Writing Committee for the COMEBAC Study Group, Morin L, Savale L, et al (2021) Four-Month Clinical Status of a Cohort of Patients After Hospitalization for COVID-19. *JAMA* 325:1525–1534. <https://doi.org/10.1001/jama.2021.3331>
14. Augustin M, Schommers P, Stecher M, et al (2021) Post-COVID syndrome in non-hospitalised patients with COVID-19: a longitudinal prospective cohort study. *The Lancet Regional Health - Europe* 6:100122. <https://doi.org/10.1016/j.lanepe.2021.100122>
15. Romero-Duarte Á, Rivera-Izquierdo M, Guerrero-Fernández de Alba I, et al (2021) Sequelae, persistent symptomatology and outcomes after COVID-19 hospitalization: the ANCOHVID multicentre 6-month follow-up study. *BMC Medicine* 19:129. <https://doi.org/10.1186/s12916-021-02003-7>

16. Shang YF, Liu T, Yu JN, et al (2021) Half-year follow-up of patients recovering from severe COVID-19: Analysis of symptoms and their risk factors. *Journal of Internal Medicine* 290:444–450. <https://doi.org/10.1111/joim.13284>
17. Pilotto A, Cristillo V, Cotti Piccinelli S, et al (2021) Long-term neurological manifestations of COVID-19: prevalence and predictive factors. *Neurol Sci* 42:4903–4907. <https://doi.org/10.1007/s10072-021-05586-4>
18. Blomberg B, Mohn KG-I, Brokstad KA, et al (2021) Long COVID in a prospective cohort of home-isolated patients. *Nature Medicine* 27:1607–1613. <https://doi.org/10.1038/s41591-021-01433-3>
19. Zhang X, Wang F, Shen Y, et al (2021) Symptoms and Health Outcomes Among Survivors of COVID-19 Infection 1 Year After Discharge From Hospitals in Wuhan, China. *JAMA Network Open* 4:e2127403. <https://doi.org/10.1001/jamanetworkopen.2021.27403>
20. Moreno-Pérez O, Merino E, Leon-Ramírez J-M, et al (2021) Post-acute COVID-19 syndrome. Incidence and risk factors: A Mediterranean cohort study. *Journal of Infection* 82:378–383. <https://doi.org/10.1016/j.jinf.2021.01.004>
21. Logue JK, Franko NM, McCulloch DJ, et al (2021) Sequelae in Adults at 6 Months After COVID-19 Infection. *JAMA Network Open* 4:e210830–e210830. <https://doi.org/10.1001/jamanetworkopen.2021.0830>
22. Peghin M, Palese A, Venturini M, et al (2021) Post-COVID-19 symptoms 6 months after acute infection among hospitalized and non-hospitalized patients. *Clinical Microbiology and Infection* 27:1507–1513. <https://doi.org/10.1016/j.cmi.2021.05.033>
23. Søråas A, Kalleberg KT, Dahl JA, et al (2021) Persisting symptoms three to eight months after non-hospitalized COVID-19, a prospective cohort study. *PLOS ONE* 16:e0256142. <https://doi.org/10.1371/journal.pone.0256142>
24. Anaya J-M, Rojas M, Salinas ML, et al (2021) Post-COVID syndrome. A case series and comprehensive review. *Autoimmunity Reviews* 20:102947. <https://doi.org/10.1016/j.autrev.2021.102947>
25. Mahmud R, Rahman MM, Rassel MA, et al (2021) Post-COVID-19 syndrome among symptomatic COVID-19 patients: A prospective cohort study in a tertiary care center of Bangladesh. *PLoS One* 16:e0249644. <https://doi.org/10.1371/journal.pone.0249644>
26. Taquet M, Dercon Q, Luciano S, et al (2021) Incidence, co-occurrence, and evolution of long-COVID features: A 6-month retrospective cohort study of 273,618 survivors of COVID-19. *PLoS Med* 18:e1003773. <https://doi.org/10.1371/journal.pmed.1003773>
27. Sigfrid L, Drake TM, Pauley E, et al (2021) Long Covid in adults discharged from UK hospitals after Covid-19: A prospective, multicentre cohort study using the ISARIC WHO Clinical Characterisation Protocol. *The Lancet Regional Health – Europe* 8. <https://doi.org/10.1016/j.lanepe.2021.100186>
28. Gautam N, Madathil S, Tahani N, et al (2022) Medium-Term Outcomes in Severely to Critically Ill Patients With Severe Acute Respiratory Syndrome Coronavirus 2 Infection. *Clinical Infectious Diseases* 74:301–308. <https://doi.org/10.1093/cid/ciab341>
29. Tabacof L, Tosto-Mancuso J, Wood J, et al (2022) Post-acute COVID-19 Syndrome Negatively Impacts Physical Function, Cognitive Function, Health-Related Quality of Life, and Participation. *American Journal of Physical Medicine & Rehabilitation* 101:48. <https://doi.org/10.1097/PHM.0000000000001910>
30. Premraj L, Kannapadi NV, Briggs J, et al (2022) Mid and long-term neurological and neuropsychiatric manifestations of post-COVID-19 syndrome: A meta-analysis. *J Neurol Sci* 434:120162. <https://doi.org/10.1016/j.jns.2022.120162>
31. Chudzik M, Babicki M, Kapusta J, et al (2022) Long-COVID Clinical Features and Risk Factors: A Retrospective Analysis of Patients from the STOP-COVID Registry of the PoLoCOV Study. *Viruses* 14:1755. <https://doi.org/10.3390/v14081755>

32. Kim Y, Bitna-Ha, Kim S-W, et al (2022) Post-acute COVID-19 syndrome in patients after 12 months from COVID-19 infection in Korea. *BMC Infectious Diseases* 22:93. <https://doi.org/10.1186/s12879-022-07062-6>
33. Nehme M, Vetter P, Chappuis F, et al (2022) Prevalence of Post-COVID Condition 12 Weeks After Omicron Infection Compared With Negative Controls and Association With Vaccination Status. *Clinical Infectious Diseases*. <https://doi.org/10.1093/cid/ciac947>
34. Raj SVA, Jacob A, Ambu V, et al (2022) Post COVID-19 clinical manifestations and its risk factors among patients in a Northern District in Kerala, India. *J Family Med Prim Care* 11:5312–5319. [https://doi.org/10.4103/jfmpe.jfmpe\\_131\\_22](https://doi.org/10.4103/jfmpe.jfmpe_131_22)
35. Khandker S, Akther A, Syed BH, et al (2022) Post-COVID-19 complications in home and hospital-based care: A study from Dhaka city, Bangladesh. *Frontiers in Rehabilitation Sciences* 3:
36. Heesakkers H, van der Hoeven JG, Corsten S, et al (2022) Clinical Outcomes Among Patients With 1-Year Survival Following Intensive Care Unit Treatment for COVID-19. *JAMA* 327:559–565. <https://doi.org/10.1001/jama.2022.0040>
37. Alghamdi SA, Alfares MA, Alsulami RA, et al (2022) Post-COVID-19 Syndrome: Incidence, Risk Factor, and the Most Common Persisting Symptoms. *Cureus* 14:e32058. <https://doi.org/10.7759/cureus.32058>
38. Taruffi L, Muccioli L, Mitolo M, et al (2023) Neurological Manifestations of Long COVID: A Single-Center One-Year Experience. *Neuropsychiatr Dis Treat* 19:311–319. <https://doi.org/10.2147/NDT.S387501>
39. Muzyka I, Yakhnyska M, Savytska M, Zayachkivska O (2023) Long COVID prevalence and physiology-centered risks: population-based study in Ukraine. *Inflammopharmacology*. <https://doi.org/10.1007/s10787-023-01177-1>
40. Jung YH, Ha E-H, Park J, et al (2023) Neurological and Psychiatric Manifestations of Post-COVID-19 Conditions. *J Korean Med Sci* 38:e83. <https://doi.org/10.3346/jkms.2023.38.e83>
41. Hedberg P, Granath F, Bruchfeld J, et al (2023) Post COVID-19 condition diagnosis: A population-based cohort study of occurrence, associated factors, and healthcare use by severity of acute infection. *J Intern Med* 293:246–258. <https://doi.org/10.1111/joim.13584>
42. Abu Hamdh B, Nazzal Z (2023) A prospective cohort study assessing the relationship between long-COVID symptom incidence in COVID-19 patients and COVID-19 vaccination. *Scientific Reports* 13:4896. <https://doi.org/10.1038/s41598-023-30583-2>
43. Ahmed JO, Ahmad SA, Hassan MN, et al (2022) Post COVID-19 neurological complications; a meta-analysis. *Ann Med Surg (Lond)* 76:103440. <https://doi.org/10.1016/j.amsu.2022.103440>
